# Supplementary material for: Follow-up After Pediatric Mental Health Emergency Visits
Source: Oxford University Press journal article supplement (doi:10.1542/peds.2022-057383), 2023-02-13
Supplement: peds_2022057383supplementarydata.pdf [file peds_2022057383supplementarydata.pdf]

## Supplemental Information

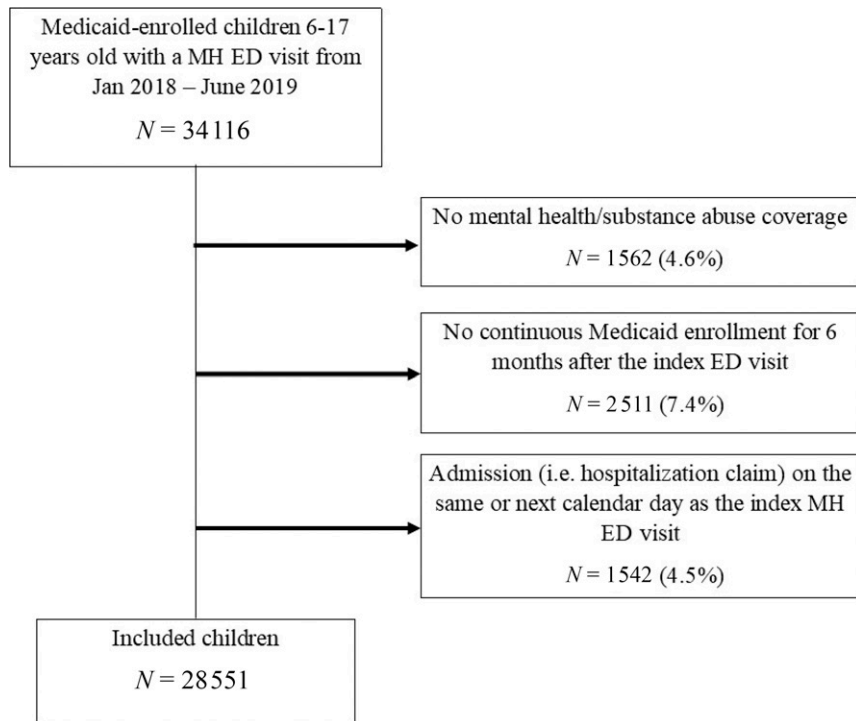

### SUPPLEMENTAL FIGURE 2

Inclusion/exclusion flow diagram. ED, emergency department; MH, mental health.
